# Supplementary material for: Alpha-Tocotrienol Prevents Oxidative Stress-Mediated Post-Translational Cleavage of Bcl-xL in Primary Hippocampal Neurons
Source: PubMed Central journal article supplement (PMC6982044; doi:10.3390/ijms21010220), 2019-12-28
Supplement: ijms-21-00220-s001.pdf [file ijms-21-00220-s001.pdf]

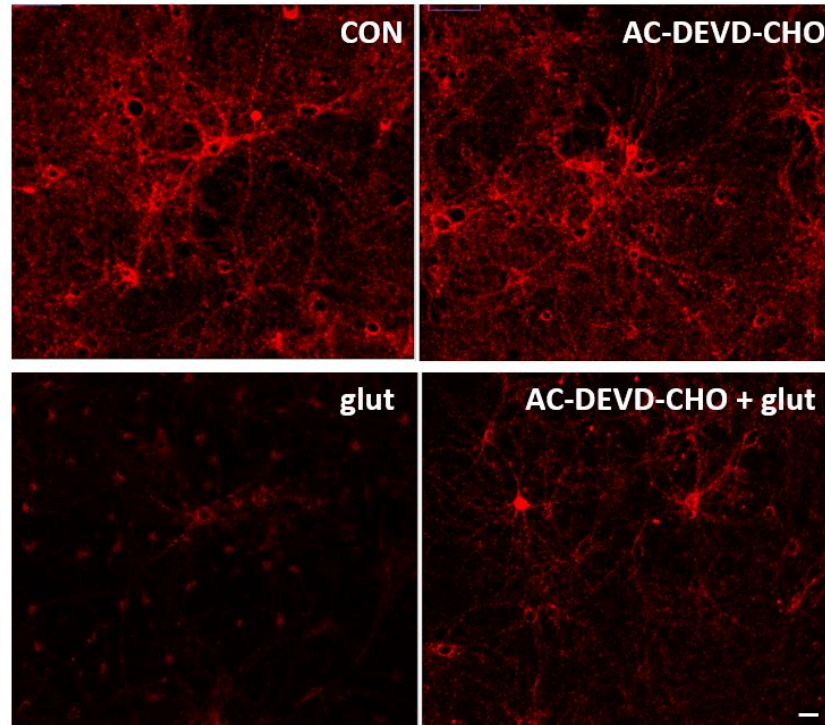

Supplement S1. **AC-DEVD-CHO prevents mitochondrial potential loss against glutamate challenge.** Primary hippocampal neurons were treated with Ac-DEVD-CHO (10 $\mu$ M), glutamate (20 $\mu$ M), or a combination of both. TMRM-stained neurons were imaged at 6h after treatment. Scale bar = 20  $\mu$ m.
